# Supplementary material for: A global surface CO 2 flux dataset (2015–2022) inferred from OCO-2 retrievals using the GONGGA inversion system
Source: Copernicus journal article supplement (doi:10.5194/essd-16-2857-2024), 2024-06-19
Supplement: Supplementary file 1 [file essd-16-2857-2024-supplement.pdf]

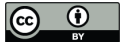

*Supplement of*

## **A global surface CO<sub>2</sub> flux dataset (2015–2022) inferred from OCO-2 retrievals using the GONGGA inversion system**

**Zhe Jin et al.**

*Correspondence to:* Xiangjun Tian ([tianxj@itpcas.ac.cn](mailto:tianxj@itpcas.ac.cn)) and Yilong Wang ([wangyilong@itpcas.ac.cn](mailto:wangyilong@itpcas.ac.cn))

The copyright of individual parts of the supplement might differ from the article licence.

### Text S1: Method for calculating prior and posterior uncertainties

For the flux optimization, the optimized variable is the scaling factor. The posterior flux is the product of the posterior scaling factor and the prior flux:

$$F_{t,i,j}^{post} = \lambda_{t,i,j}^{post} \times F_{t,i,j}^{prior}, \quad (S1)$$

where  $F_{t,i,j}^{post}$  is the posterior carbon flux,  $\lambda_{t,i,j}^{post}$  is the posterior scaling factor, and  $F_{t,i,j}^{prior}$  is the prior carbon flux,  $t$  denotes the current  $t$  th window,  $i$  denotes the  $i$  th grid in longitude, and  $j$  denotes the  $j$  th grid in latitude. Both of fluxes and scaling factors are gridded variables with the same horizontal resolution as the transport model. To characterize the prior uncertainty of NEE and ocean carbon fluxes, the NLS-4DVar method applies an ensemble to approximate the prior error covariance matrix (Tian et al., 2018):

$$\mathbf{B} = \frac{(\mathbf{P}_x^{prior})(\mathbf{P}_x^{prior})^T}{N-1}. \quad (S2)$$

where  $\mathbf{P}_x^{prior} = (\mathbf{x}'_1, \mathbf{x}'_2, \dots, \mathbf{x}'_N)$  is an ensemble of prior perturbations,  $\mathbf{x}'_j = \mathbf{x}_j - \mathbf{x}_a$ ,  $j = 1, 2, \dots, N$ ,  $\mathbf{x}'_j$  is the  $j$  th perturbation,  $\mathbf{x}_j$  is the  $j$  th sample, and  $N$  is the number of prior perturbations. In this study,  $N$  equals to 36. The prior perturbations of the scaling factors in the first inversion window were obtained through historical sampling of fluxes. We first created 108 samples from historical fluxes, which consists of the monthly mean fluxes from January 1, 2011 to December 31, 2019. Then they divided the monthly mean flux in September 2014 and subtracted 1 to form the ensemble of perturbations of flux scaling factors. Subsequently, 36 samples that could represent the key spatial patterns of the large ensemble were extracted using Random State Variable (RSV) method (Zhang et al., 2020), forming the prior perturbations for the first inversion window. After the inversion of the first window, the prior perturbations of the next window were updated (Tian et al., 2020):

$$\mathbf{P}_x^{prior,w+1} = \mathbf{P}_x^{prior,w} \mathbf{V}_2 \Phi^T \quad (S3)$$

Where  $\mathbf{P}_x^{prior,w+1}$  is the ensemble of the prior perturbations for the next window, and  $\mathbf{P}_x^{prior,w}$  is the ensemble of the prior perturbations for the current window. The matrix  $\mathbf{V}_2$  can be calculated by Eq. (S5-S7) detailed below, and  $\Phi^T$  is a random orthogonal matrix. The procedure was repeated through all inversion windows. Both NEE and ocean-atmosphere fluxes applied this sample generation method. The historical NEE were from ORHIDEE-MICT simulations (Guimberteau et al., 2018), and historical ocean-atmosphere fluxes were from Takahashi climatology results (Takahashi et al., 2009). As a result, the total uncertainty of our prior land and ocean fluxes at a global scale and for a full year, before assimilating XCO<sub>2</sub> observations, amount to an average of 4.7 Pg C yr<sup>-1</sup> and 0.28 Pg C yr<sup>-1</sup>, respectively. According to Evensen (2009), the ensemble of posterior perturbations after assimilation is calculated as follows:

$$\mathbf{P}_x^{post} = \mathbf{P}_x^{prior} \mathbf{V}_2 \sqrt{\mathbf{I} - \Sigma_2^T \Sigma_2} \Phi^T, \quad (S4)$$

where

$$\mathbf{U}_2 \Sigma_2 \mathbf{V}_2^T = \mathbf{X}_2, \quad (S5)$$

$$\mathbf{X}_2 = \Lambda^{-1/2} \mathbf{Z}^T \mathbf{P}_y, \quad (S6)$$

$$\mathbf{Z} \Lambda^{-1} \mathbf{Z}^T = [(\mathbf{P}_y)(\mathbf{P}_y)^T + (N-1)\mathbf{R}]^{-1}. \quad (S7)$$

and  $\Phi$  is a random orthogonal matrix,  $\mathbf{P}_y = h(\mathbf{P}_x^{prior}) - h(\mathbf{x}_a)$ . Then, the prior ( $\mathbf{B}$ ) and posterior ( $\mathbf{B}^{post}$ ) error covariance matrices can be calculated using  $\mathbf{P}_x^{prior}$  and  $\mathbf{P}_x^{post}$ , respectively, according to Eq. (S2).

After obtaining the prior and posterior uncertainties of the scaling factors, the prior and posterior total flux uncertainties ( $\sigma_{total}^{prior}$  and  $\sigma_{total}^{post}$ ) can be calculated according to the correlation between fluxes and scaling factors (Niwa and Fujii, 2020):

$$\sigma_{total}^{prior} = \sqrt{(\mathbf{F}^{prior})^T \mathbf{B} (\mathbf{F}^{prior})}, \quad (S7)$$

$$\sigma_{total}^{post} = \sqrt{(\mathbf{F}^{prior})^T \mathbf{B}^{post} (\mathbf{F}^{prior})}. \quad (S8)$$

where we assume that the flux uncertainties are time independent.

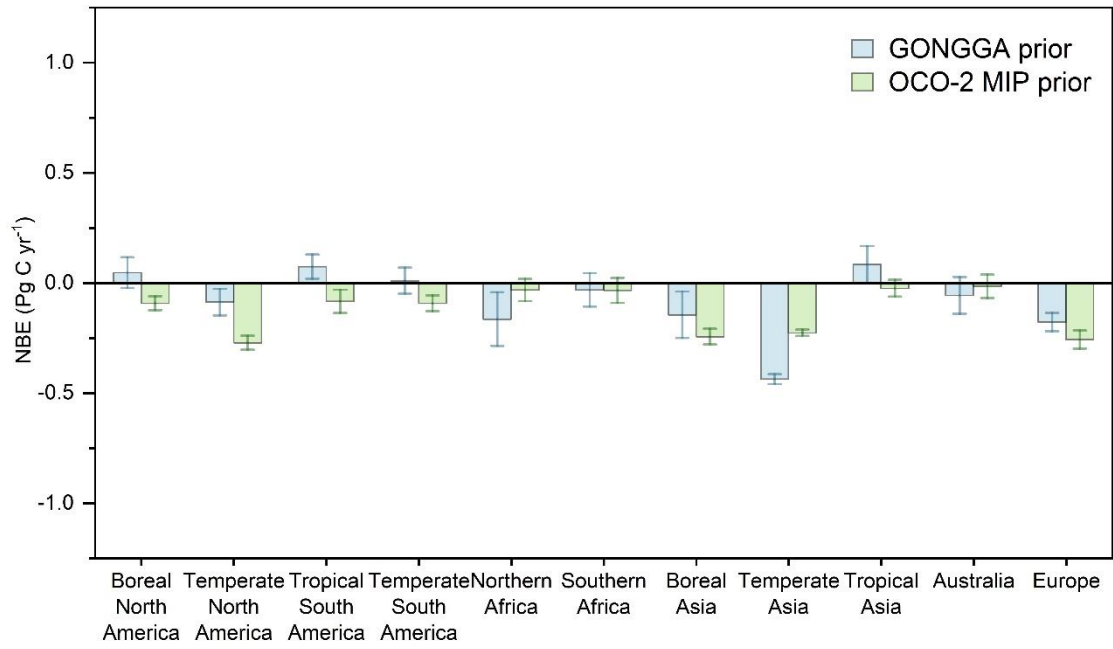

**Figure S1. Annual mean (2015–2022) NBE at 11 TransCom land regions from GONGGA prior and OCO-2 MIP prior estimates. Error bar of NBE represents multi-year standard deviation.**

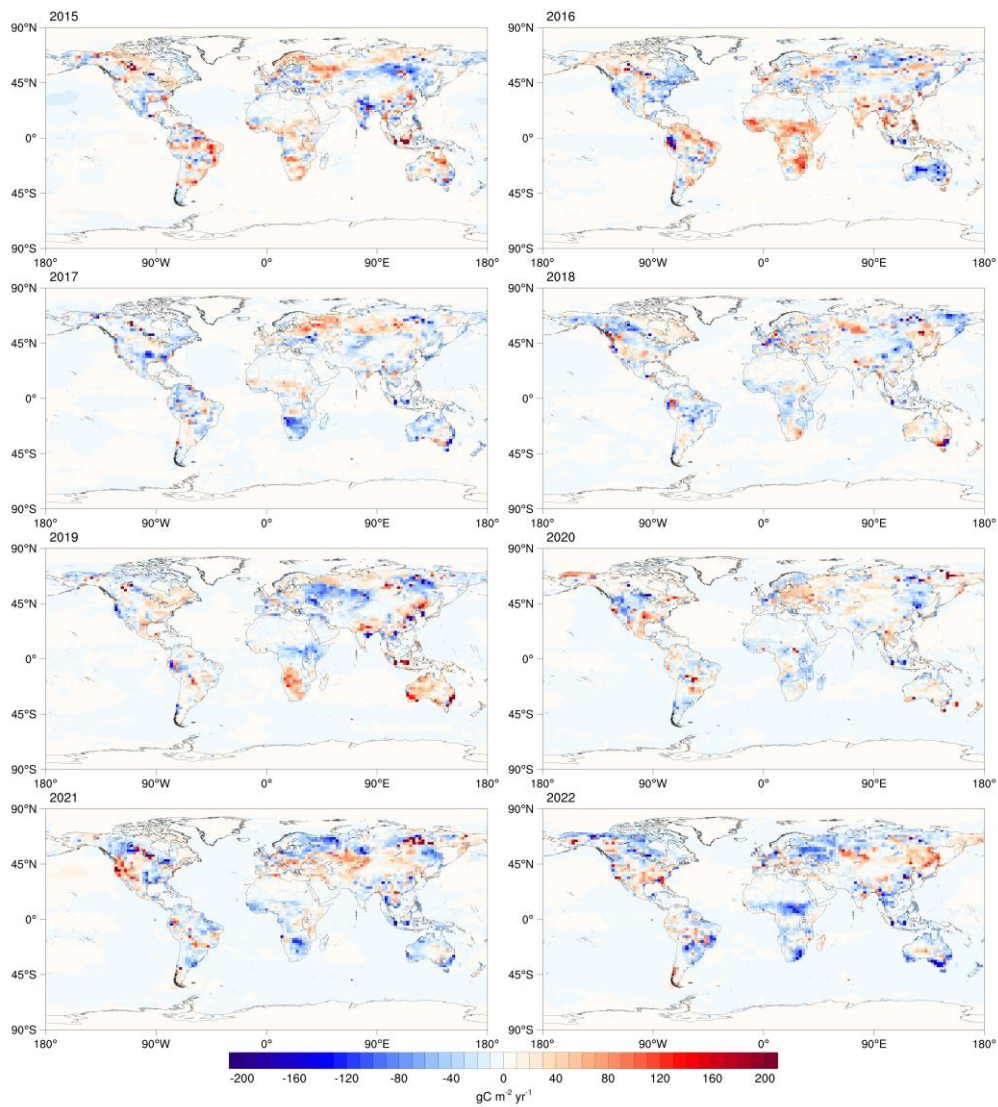

**Figure S2. The annual NBE and ocean flux anomalies (annual value minus 8-year mean) during 2015–2022 period.**

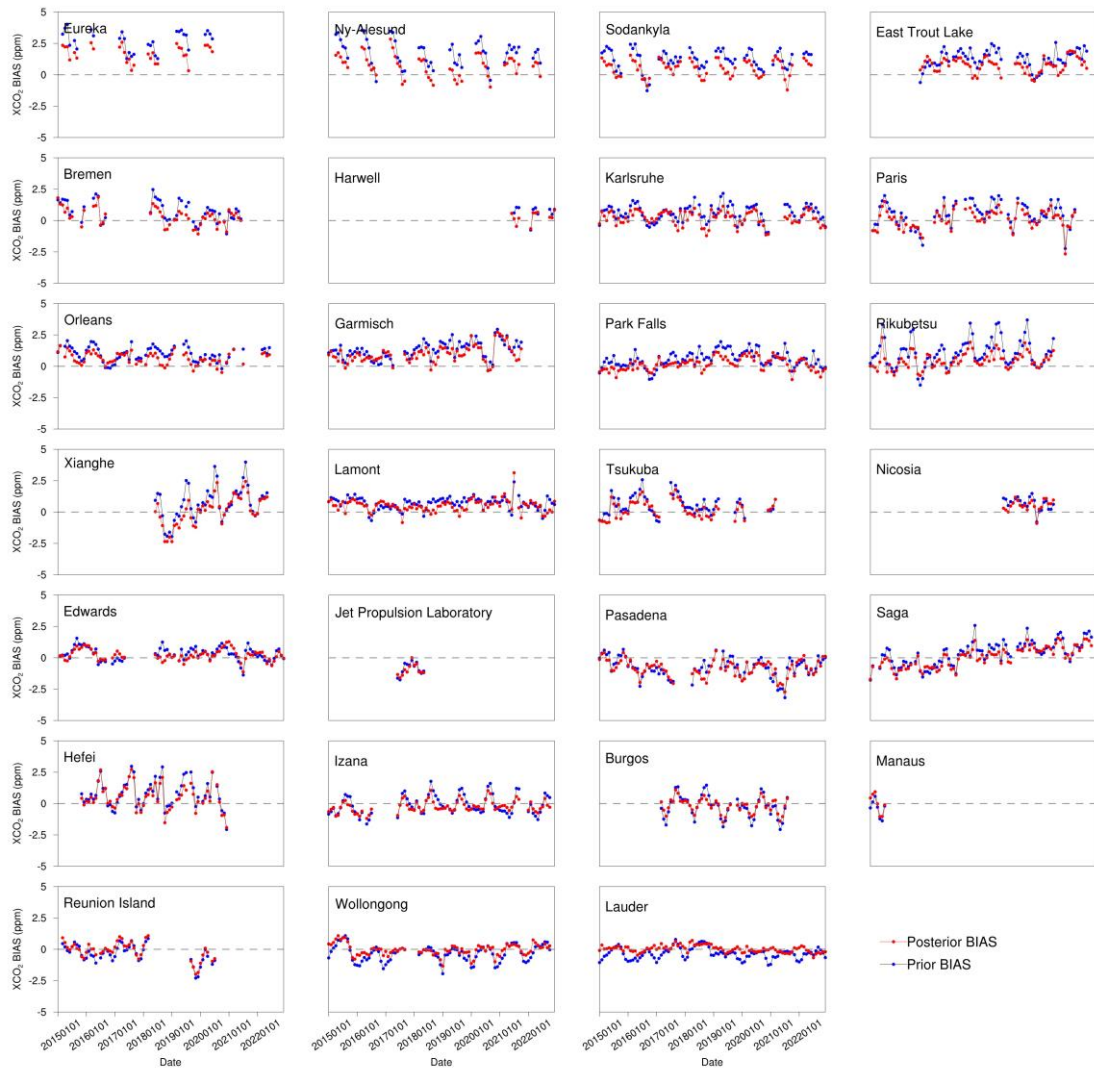

**Figure S3. Time series of monthly averaged prior (blue) and posterior (red) simulated XCO<sub>2</sub> bias at each TCCON site (prior/posterior simulation – observation).**

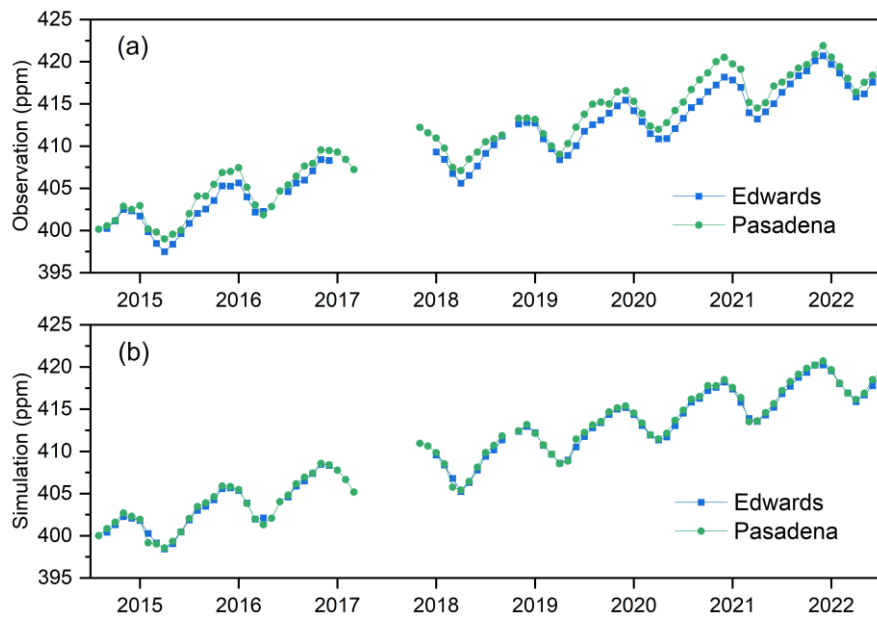

**Figure S4. Time series of monthly (a) TCCON observations and (b) corresponding posterior simulations at Edwards (blue) and Pasadena (green) during 2015–2021 period.**

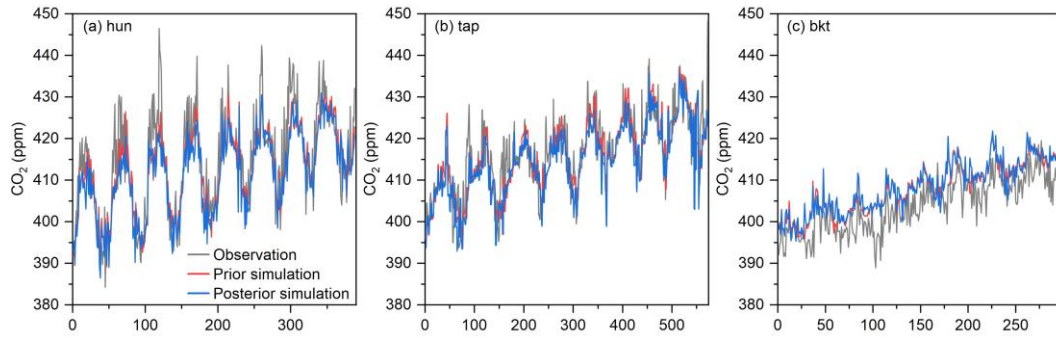

Figure S5. Time series of ObsPack surface flask observations as well as corresponding prior and posterior simulations at three sites that posterior RMSE exceed 4.0 ppm.

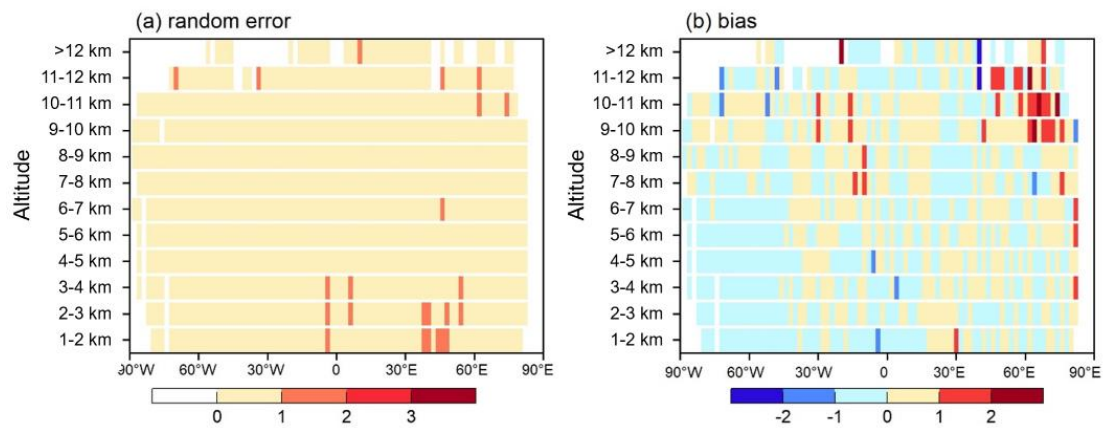

Figure S6. (a) random error and (b) bias between posterior CO<sub>2</sub> simulations and aircraft observations as a function of latitude and altitude (posterior simulations minus observations; unit: ppm). The altitudes are binned every kilometer from 1 km to 12 km, and for altitudes above 12 km.



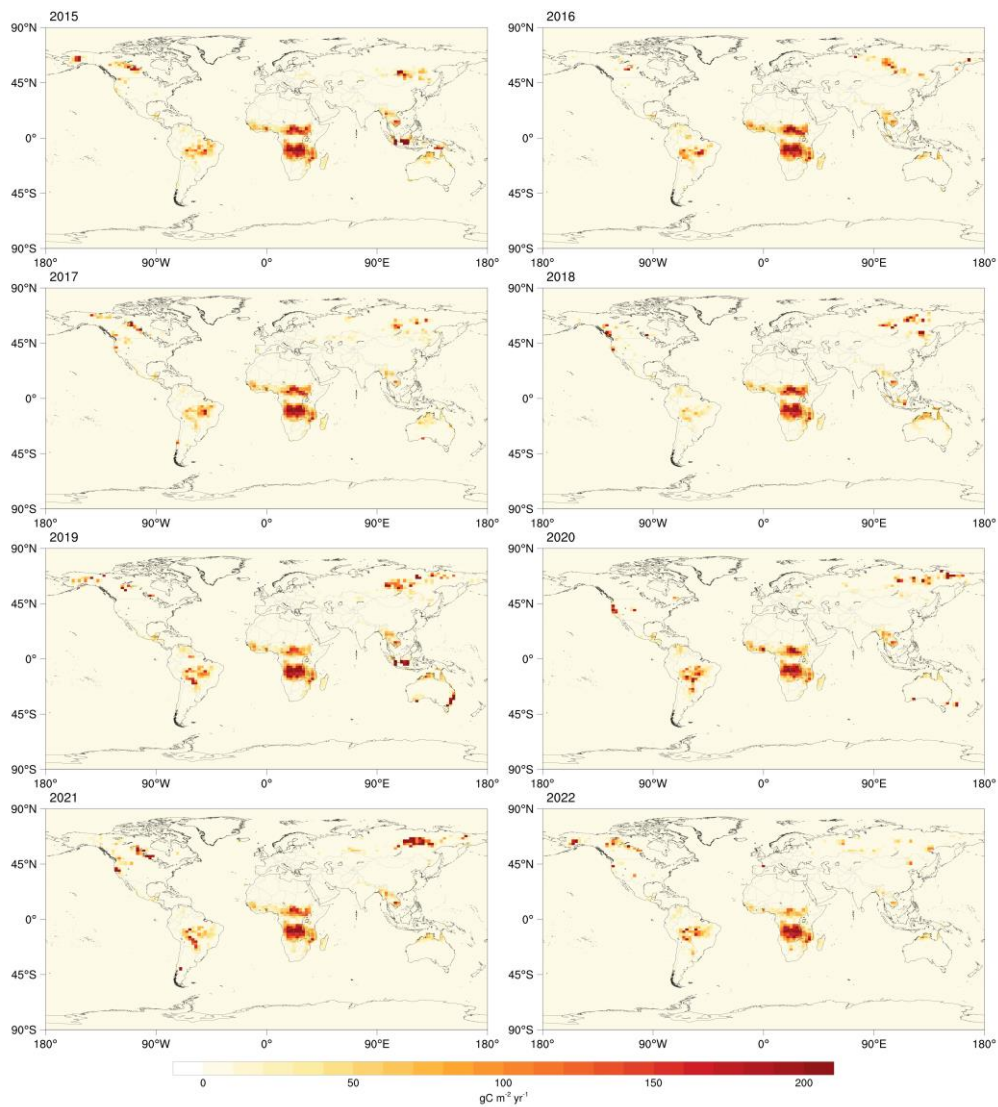

**Figure S7.** The spatial distribution of biomass burning emissions from GFED4.1s estimate during 2015–2022 period.

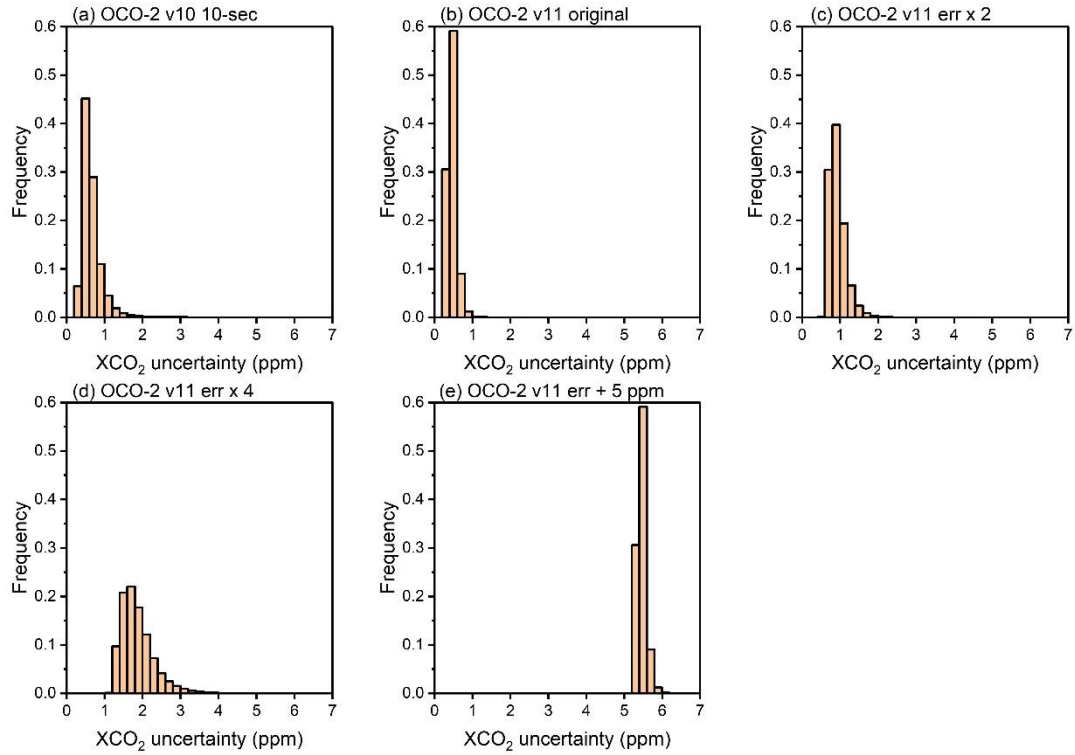

**Figure S8.** The distribution of (a) OCO-2 v10r 10 s averaged XCO<sub>2</sub> uncertainties, (b) default OCO-2 v11r XCO<sub>2</sub> uncertainties, (c) OCO-2 v11r XCO<sub>2</sub> uncertainties doubled, (d) OCO-2 v11r XCO<sub>2</sub> uncertainties quadrupled, and (e) OCO-2 v11r XCO<sub>2</sub> uncertainties added by 5 ppm.

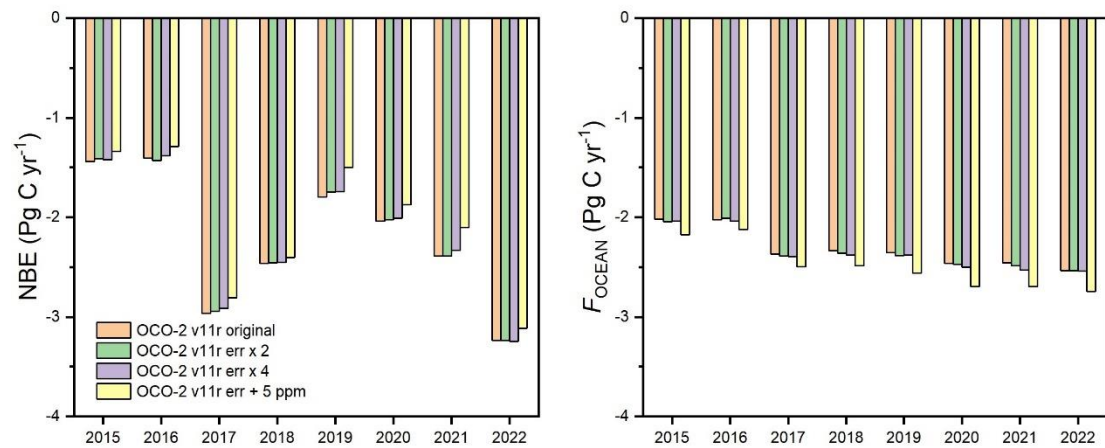

**Figure S9.** The global annual NBE and  $F_{\text{OCEAN}}$  from GONGGA posterior estimates with default OCO-2 v11r XCO<sub>2</sub> uncertainties (orange), doubled OCO-2 v11r original XCO<sub>2</sub> uncertainties (green), quadrupled OCO-2 v11r original XCO<sub>2</sub> uncertainties (purple), and OCO-2 v11r original XCO<sub>2</sub> uncertainties added by 5 ppm (yellow).

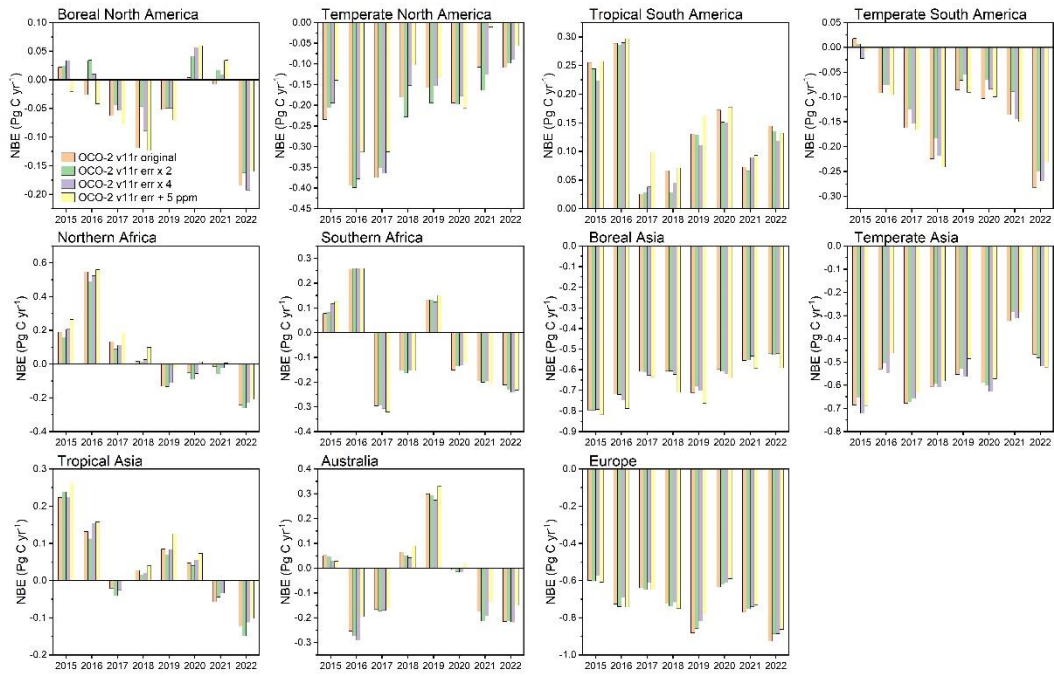

**Figure S10. NBE in 11 TransCom land regions from GONGGA posterior estimates with default OCO-2 v11r  $\text{XCO}_2$  uncertainties (orange), doubled OCO-2 v11r original  $\text{XCO}_2$  uncertainties (green), quadrupled OCO-2 v11r  $\text{XCO}_2$  uncertainties (purple), and OCO-2 v11r  $\text{XCO}_2$  uncertainties added by 5 ppm (yellow).**

**Table S1. OCO-2 MIP v10 participants and model details.**

| Model     | Contact                                                 | Institution                          | Transport Model | Meteorology | Inverse Method     |
|-----------|---------------------------------------------------------|--------------------------------------|-----------------|-------------|--------------------|
| Ames      | Matthew Johnson and Sajeev Philip                       | NASA Ames Research Center            | GEOS-Chem       | MERRA-2     | 4D-Var             |
| CAMS      | Frédéric Chevallier                                     | LSCE France                          | LMDz            | ERA-interim | 4D-Var             |
| COLA      | Zhiqiang Liu                                            | –                                    | –               | –           | –                  |
| CMS-Flux  | Junjie Liu                                              | NASA JPL                             | GEOS-Chem       | GEOS-FP     | 4D-Var             |
| CSU       | Andrew Schuh                                            | Colorado State University            | GEOS-Chem       | MERRA-2     | Bayesian synthesis |
| CT        | Andy Jacobson                                           | University of Colorado and NOAA GML  | TM5             | ERA-interim | EnKF               |
| JHU       | Scot Miller                                             | –                                    | –               | –           | –                  |
| LoFI      | Brad Weir                                               | –                                    | –               | –           | –                  |
| NIES      | Shamil Maksyuotov                                       | –                                    | –               | –           | –                  |
| OU        | Sean Crowell                                            | University of Oklahoma               | TM5             | ERA-interim | 4D-Var             |
| PCTM      | David Baker                                             | Colorado State University            | PCTM            | MERRA-2     | 4D-Var             |
| TM5-4DVAR | Sourish Basu                                            | University of Maryland and NASA GMAO | TM5             | ERA-interim | 4D-Var             |
| UT        | Feng Deng                                               | University of Toronto                | GEOS-Chem       | GEOS-FP     | 4D-Var             |
| WOMBAT    | Michael Bertolacci, Andrew Zammit Mangion, Cressie Noel | University of Wollongong             | GEOS-Chem       | MERRA-2     | MCMC               |

**Table S2. Annual and six-year mean NBP at Boreal North America and Northern Africa from OCO-2 MIP v10 IS and LNLG experiments. Uncertainties are the one standard deviation spread in the inversion ensemble.**

| Region               | Year | Experiment | NBE (PgC yr <sup>-1</sup> ) | Experiment | NBE          |
|----------------------|------|------------|-----------------------------|------------|--------------|
| Boreal North America | 2015 | IS         | -0.28 ± 0.36                | LNLG       | -0.22 ± 0.56 |
|                      | 2016 |            | -0.36 ± 0.37                |            | -0.11 ± 0.49 |
|                      | 2017 |            | -0.34 ± 0.38                |            | -0.22 ± 0.53 |
|                      | 2018 |            | -0.40 ± 0.33                |            | -0.21 ± 0.53 |
|                      | 2019 |            | -0.46 ± 0.37                |            | -0.27 ± 0.59 |
|                      | 2020 |            | -0.44 ± 0.48                |            | -0.07 ± 0.53 |
|                      | Mean |            | -0.38 ± 0.38                |            | -0.18 ± 0.54 |
| Northern Africa      | 2015 | IS         | 0.23 ± 1.42                 | LNLG       | 0.87 ± 0.89  |
|                      | 2016 |            | 0.65 ± 1.42                 |            | 1.24 ± 0.88  |
|                      | 2017 |            | 0.32 ± 1.40                 |            | 0.90 ± 0.95  |
|                      | 2018 |            | 0.01 ± 1.26                 |            | 0.70 ± 0.87  |
|                      | 2019 |            | 0.24 ± 1.15                 |            | 0.73 ± 0.85  |
|                      | 2020 |            | 0.34 ± 1.18                 |            | 0.64 ± 0.92  |
|                      | Mean |            | 0.30 ± 1.31                 |            | 0.85 ± 0.90  |

## Reference

- Evensen, G.: Data Assimilation: The Ensemble Kalman Filter, 2, Springer-Verlag Berlin Heidelberg, 307 pp., <https://doi.org/10.1007/978-3-642-03711-5>, 2009.
- Guimberteau, M., Zhu, D., Maignan, F., Huang, Y., Yue, C., Dantec-Nédélec, S., Ottlé, C., Jornet-Puig, A., Bastos, A., Laurent, P., Goll, D., Bowring, S., Chang, J., Guenet, B., Tifafi, M., Peng, S., Krinner, G., Ducharne, A., Wang, F., Wang, T., Wang, X., Wang, Y., Yin, Z., Lauerwald, R., Joetzjer, E., Qiu, C., Kim, H., and Ciais, P.: ORCHIDEE-MICT (v8.4.1), a land surface model for the high latitudes: model description and validation, *Geosci. Model Dev.*, 11, 121-163, <https://doi.org/10.5194/gmd-11-121-2018>, 2018.
- Niwa, Y. and Fujii, Y.: A conjugate BFGS method for accurate estimation of a posterior error covariance matrix in a linear inverse problem, *Q. J. Roy. Meteor. Soc.*, 146, 3118-3143, <https://doi.org/10.1002/qj.3838>, 2020.
- Takahashi, T., Sutherland, S. C., Wanninkhof, R., Sweeney, C., Feely, R. A., Chipman, D. W., Hales, B., Friederich, G., Chavez, F., Sabine, C., Watson, A., Bakker, D. C. E., Schuster, U., Metzl, N., Yoshikawa-Inoue, H., Ishii, M., Midorikawa, T., Nojiri, Y., Koertzing, A., Steinhoff, T., Hoppema, M., Olafsson, J., Arnarson, T. S., Tilbrook, B., Johannessen, T., Olsen, A., Bellerby, R., Wong, C. S., Delille, B., Bates, N. R., and de Baar, H. J. W.: Climatological mean and decadal change in surface ocean pCO<sub>2</sub>, and net sea-air CO<sub>2</sub> flux over the global oceans, *Deep-Sea Res. Pt. II*, 56, 554-577, <https://doi.org/10.1016/j.dsr2.2008.12.009>, 2009.
- Tian, X., Zhang, H., Feng, X., and Xie, Y.: Nonlinear least squares En4DVar to 4DVar methods for data assimilation: Formulation, analysis, and preliminary evaluation, *Mon. Weather Rev.*, 146, 77-93, <https://doi.org/10.1175/mwr-d-17-0050.1>, 2018.
- Zhang, H., Tian, X., Cheng, W., and Jiang, L.: System of Multigrid Nonlinear Least-squares Four-dimensional Variational Data Assimilation for Numerical Weather Prediction (SNAP): System Formulation and Preliminary Evaluation, *Adv. Atmos. Sci.*, 37, 1267-1284, <https://doi.org/10.1007/s00376-020-9252-1>, 2020.
